# Supplementary material for: Komagataella phaffii Cue5 Piggybacks on Lipid Droplets for Its Vacuolar Degradation during Stationary Phase Lipophagy
Source: MDPI journal article supplement (doi:10.3390/cells11020215), 2022-01-10
Supplement: s1 [file s1]

Supplementary Materials

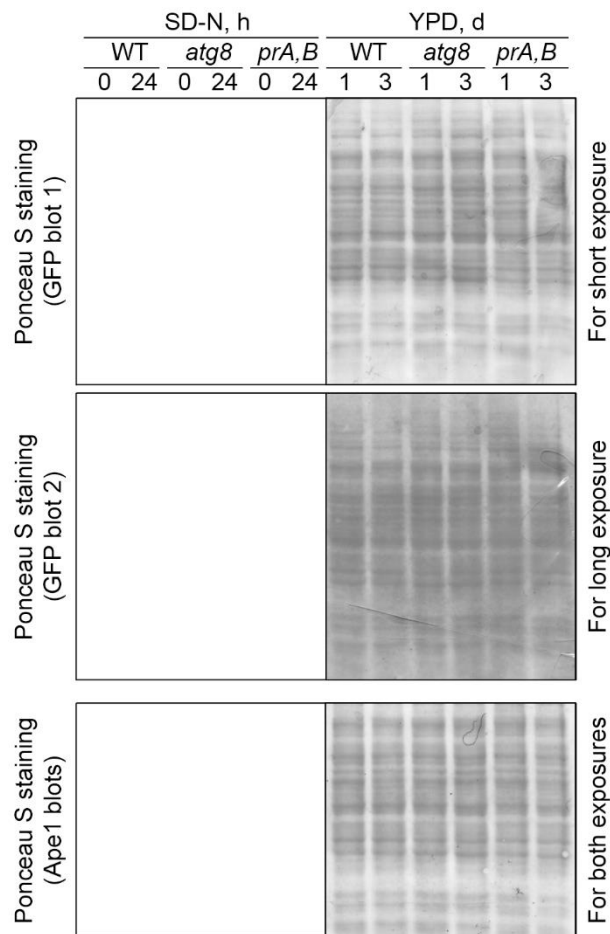

**Figure S1.** Supplementary figure for Figure 2. Ponceau S staining (loading control for the S-phase lipophagy portions of the membranes). The SD-N portions were intentionally left blank as loading control was not applicable there (see Figure 2 legend for details).

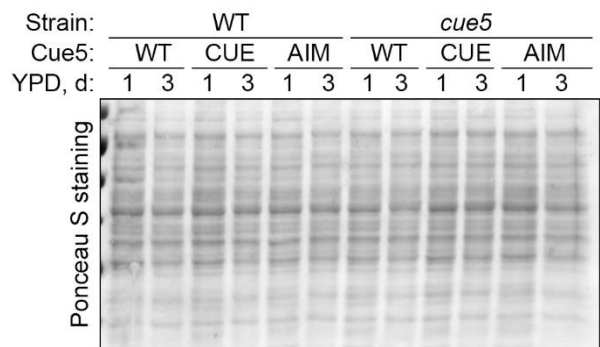

**Figure S2.** Supplementary figure for Figure 3. Ponceau S staining (loading control). See the legend of Figure 3 for details.

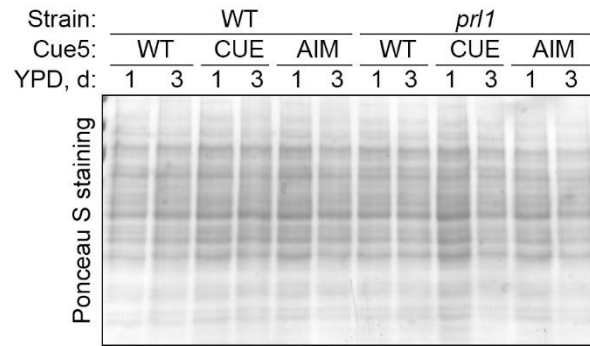

**Figure S3.** Supplementary figure for Figure 4. Ponceau S staining (loading control). See the legend of Figure 4 for details.

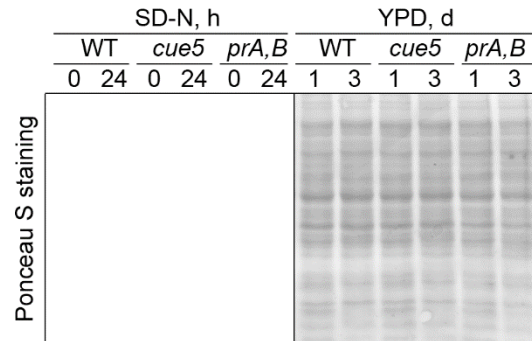

**Figure S4.** Supplementary figure for Figure 5. Ponceau S staining (loading control for the S-phase lipophagy portion of the membrane). The SD-N portion was intentionally left blank as loading control was not applicable there (see Figure 5 legend for details).
